# Supplementary material
Source: Springer Nature journal article supplement (https://www.springermedizin.de/resource/supplementary/12933_2012_493_MOESM6_ESM.pdf/9538602)

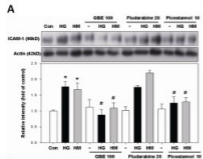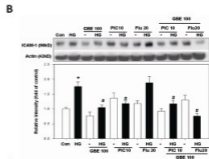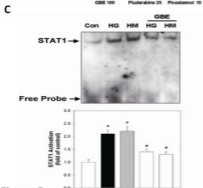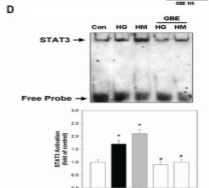

Figure. 5

Supplement: MOESM6 [file 9538602]
